# Supplementary material for: Insight into the Mechanism of CO Oxidation on WO3(001) Surfaces for Gas Sensing: A DFT Study
Source: MDPI journal article supplement (doi:10.3390/s17081898), 2017-08-17
Supplement: s1 [file s1]

# Supplementary Materials

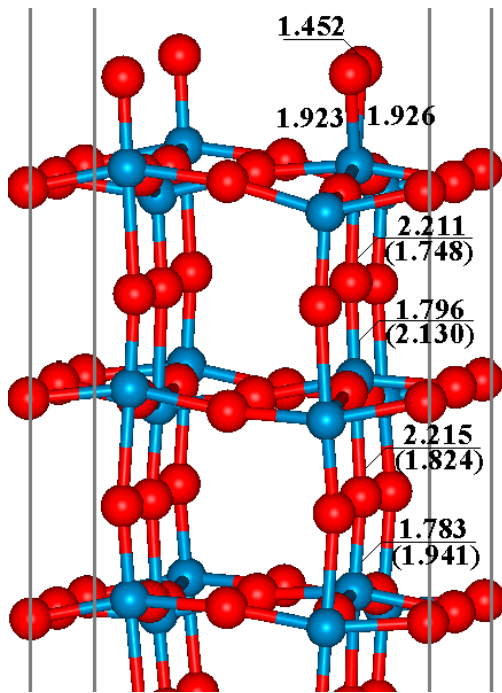

1.110eV

(a)

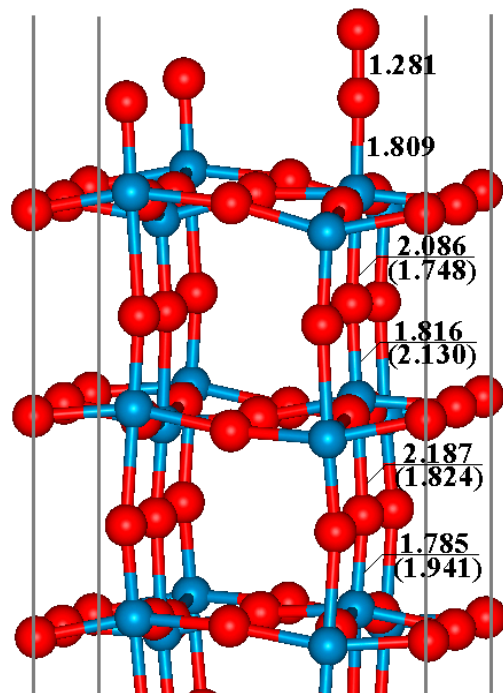

0.450eV

(b)

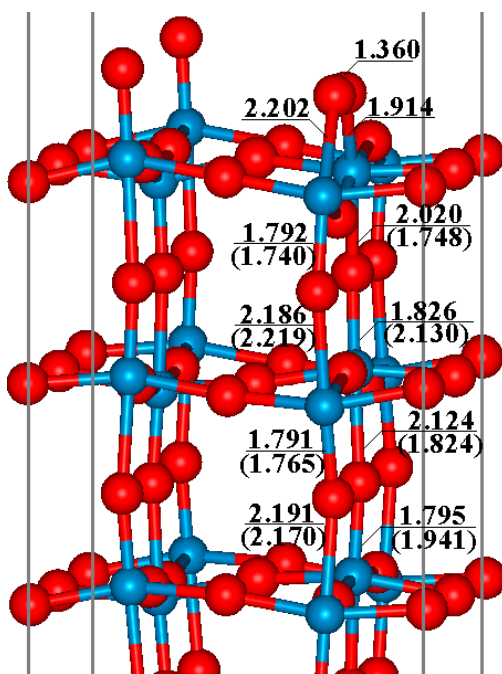

0.378eV

(c)

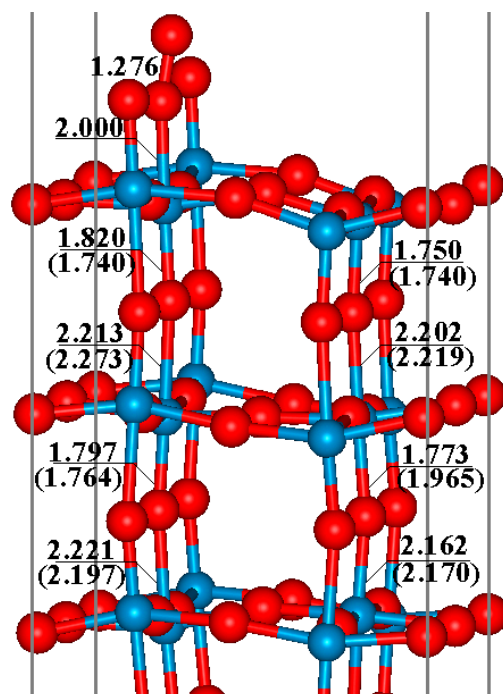

-0.597eV

(d)

Figure S1. Cont.

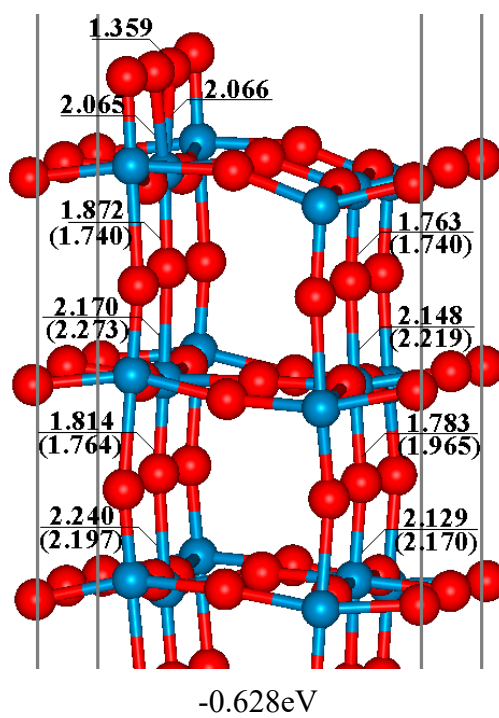

(e)

**Figure S1.** Possible adsorption configurations for O<sub>2</sub> adsorption on the defective WO<sub>3</sub>(001) surface. The bond lengths (Å) close to the adsorption site are given, and the data in the parenthesis are in relative to the defective WO<sub>3</sub>(001) surface before O<sub>2</sub> adsorption. In addition, the corresponding adsorption energies have also been provided.
